# Supplementary material for: Performance of DNA metabarcoding, standard barcoding, and morphological approach in the identification of host–parasitoid interactions
Source: PubMed Central journal article supplement (PMC5728528; doi:10.1371/journal.pone.0187803), 2017-12-13
Supplement: pone.0187803.s001.pdf [file pone.0187803.s001.pdf]

**S1 Table. Taxonomic assignments of hosts and parasitoids present in mock samples by morphological identification, standard barcoding, and metabarcoding.**

| Sample | Organism   | Origin   | Life stage | Size (mm) | BIN     | Morphological identification    | Standard barcoding              | Metabarcoding                   |
|--------|------------|----------|------------|-----------|---------|---------------------------------|---------------------------------|---------------------------------|
| S1     | host       | original | larva      | 39.0      | AAD9024 | <i>Orthosia cruda</i>           | <i>Orthosia cruda</i>           | <i>Orthosia cruda</i>           |
|        | parasitoid | original | adult      | 2.0       | ACJ7542 | <i>Pteromalus</i>               | Pteromalidae                    | Pteromalidae                    |
|        | parasitoid | added    | larva      | 7.8       | AAU8361 | Ichneumonidae                   | <i>Hyposoter inquinatus</i>     | <i>Hyposoter</i>                |
|        | parasitoid | added    | pupa       | 2.0       | ACU3595 | Eulophidae                      | <i>Euplectrus</i>               | <i>Euplectrus</i>               |
| S2     | host       | original | larva      | 34.0      | AAC9096 | <i>Alsophila aescularia</i>     | <i>Alsophila aescularia</i>     | unidentified                    |
|        | parasitoid | original | adult      | 2.0       | ACU3753 | <i>Euplectrus bicolor</i>       | <i>Euplectrus</i>               | <i>Euplectrus</i>               |
|        | parasitoid | original | pupa       | 1.8       | ACU3753 | Eulophidae                      | <i>Euplectrus</i>               | <i>Euplectrus</i>               |
|        | parasitoid | added    | larva      | 1.5       | ACJ7542 | Pteromalidae                    | Pteromalidae                    | Pteromalidae                    |
|        | parasitoid | added    | adult      | 2.5       | ACH1961 | <i>Peribaea fissicornis</i>     | <i>Peribaea fissicornis</i>     | <i>Peribaea fissicornis</i>     |
| S3     | host       | original | larva      | 36.0      | AAC2753 | <i>Agriopsis aurantiaria</i>    | <i>Agriopsis aurantiaria</i>    | <i>Agriopsis aurantiaria</i>    |
|        | parasitoid | original | adult      | 1.9       | ACU3230 | <i>Euplectrus bicolor</i>       | <i>Euplectrus</i>               | <i>Euplectrus</i>               |
|        | parasitoid | original | pupa       | 2.0       | ACU3230 | Eulophidae                      | <i>Euplectrus</i>               | <i>Euplectrus</i>               |
|        | parasitoid | added    | pupa       | 1.7       | ACR7505 | Eulophidae                      | <i>Euplectrus bicolor</i>       | <i>Euplectrus bicolor</i>       |
|        | parasitoid | added    | adult      | 2.2       | AAN4077 | <i>Blondelia nigripes</i>       | <i>Blondelia nigripes</i>       | <i>Blondelia nigripes</i>       |
|        | parasitoid | added    | adult      | 1.8       | ACU2970 | <i>Euplectrus flavipes</i>      | Eulophidae                      | Eulophidae                      |
| S4     | host       | original | larva      | 42.0      | AAA2052 | <i>Lymantria dispar</i>         | <i>Lymantria dispar</i>         | <i>Lymantria dispar</i>         |
|        | parasitoid | original | adult      | 2.4       | AAV2164 | <i>Glyptapanteles liparidis</i> | <i>Glyptapanteles liparidis</i> | <i>Glyptapanteles liparidis</i> |
|        | parasitoid | original | pupa       | 2.1       | AAV2164 | Braconidae                      | <i>Glyptapanteles liparidis</i> | <i>Glyptapanteles liparidis</i> |
|        | parasitoid | added    | pupa       | 3.0       | ACH1961 | Tachinidae                      | <i>Peribaea fissicornis</i>     | <i>Peribaea fissicornis</i>     |
|        | parasitoid | added    | larva      | 2.9       | ACR7505 | Eulophidae                      | <i>Euplectrus bicolor</i>       | <i>Euplectrus bicolor</i>       |
| S5     | host       | original | larva      | 50.0      | AAA2052 | <i>Lymantria dispar</i>         | <i>Lymantria dispar</i>         | <i>Lymantria dispar</i>         |
|        | parasitoid | original | adult      | 3.0       | AAV2164 | <i>Glyptapanteles liparidis</i> | <i>Glyptapanteles liparidis</i> | <i>Glyptapanteles liparidis</i> |

Altogether, 17 parasitoid and 5 host specimens representing 14 putative species (BINs) were analyzed.
