# Supplementary material for: Performance of DNA metabarcoding, standard barcoding, and morphological approach in the identification of host–parasitoid interactions
Source: PubMed Central journal article supplement (PMC5728528; doi:10.1371/journal.pone.0187803), 2017-12-13
Supplement: pone.0187803.s003.pdf [file pone.0187803.s003.pdf]

**S3 Table. Overview of clusters (MOTUs) recovered by MiSeq from individual mock samples.**

| Cluster                     | S1   |       | S2  |       | S3 |       | S4  |       | S5   |       | Total |       | Origin |
|-----------------------------|------|-------|-----|-------|----|-------|-----|-------|------|-------|-------|-------|--------|
|                             | No   | %     | No  | %     | No | %     | No  | %     | No   | %     | No    | %     |        |
| Acetivibrio                 | 2    | 0.02  | 0   | 0.00  | 0  | 0.00  | 0   | 0.00  | 0    | 0.00  | 2     | 0.01  | PS     |
| Acinetobacter               | 2    | 0.02  | 0   | 0.00  | 0  | 0.00  | 0   | 0.00  | 0    | 0.00  | 2     | 0.01  | PS     |
| Agriopsis aurantiaria       | 0    | 0.00  | 0   | 0.00  | 5  | 2.06  | 0   | 0.00  | 0    | 0.00  | 5     | 0.03  | HOST   |
| Alphaproteobacteria         | 3    | 0.03  | 0   | 0.00  | 0  | 0.00  | 0   | 0.00  | 0    | 0.00  | 3     | 0.02  | PS     |
| Amyeloides transitella      | 3    | 0.03  | 0   | 0.00  | 0  | 0.00  | 0   | 0.00  | 0    | 0.00  | 3     | 0.02  | O      |
| Athetis nonagrica           | 3    | 0.03  | 0   | 0.00  | 0  | 0.00  | 0   | 0.00  | 0    | 0.00  | 3     | 0.02  | O      |
| Bacilli                     | 0    | 0.00  | 0   | 0.00  | 0  | 0.00  | 2   | 0.16  | 3    | 0.05  | 5     | 0.03  | PS     |
| Bacteria                    | 2    | 0.02  | 0   | 0.00  | 0  | 0.00  | 0   | 0.00  | 0    | 0.00  | 2     | 0.01  | PS     |
| Bacteroidales               | 2    | 0.02  | 0   | 0.00  | 0  | 0.00  | 5   | 0.40  | 2    | 0.03  | 9     | 0.05  | PS     |
| Bacteroides                 | 0    | 0.00  | 0   | 0.00  | 0  | 0.00  | 2   | 0.16  | 0    | 0.00  | 2     | 0.01  | PS     |
| Bifidobacterium             | 3    | 0.03  | 2   | 0.84  | 0  | 0.00  | 0   | 0.00  | 0    | 0.00  | 5     | 0.03  | O      |
| Bilateria                   | 2    | 0.02  | 0   | 0.00  | 0  | 0.00  | 0   | 0.00  | 0    | 0.00  | 2     | 0.01  | O      |
| Blondelia nigripes          | 0    | 0.00  | 0   | 0.00  | 64 | 26.34 | 0   | 0.00  | 0    | 0.00  | 64    | 0.32  | PAR    |
| Bombyx mori                 | 3    | 0.03  | 0   | 0.00  | 0  | 0.00  | 2   | 0.16  | 0    | 0.00  | 5     | 0.03  | O      |
| Braconidae                  | 0    | 0.00  | 0   | 0.00  | 0  | 0.00  | 4   | 0.32  | 8    | 0.13  | 12    | 0.06  | PAR    |
| Bradyrhizobiaceae           | 4    | 0.03  | 0   | 0.00  | 0  | 0.00  | 5   | 0.40  | 3    | 0.05  | 12    | 0.06  | PS     |
| Burkholderiaceae            | 4    | 0.03  | 0   | 0.00  | 0  | 0.00  | 3   | 0.24  | 5    | 0.08  | 12    | 0.06  | O      |
| Burkholderiales             | 0    | 0.00  | 0   | 0.00  | 2  | 0.82  | 0   | 0.00  | 4    | 0.06  | 6     | 0.03  | O      |
| Carcelia tibialis           | 0    | 0.00  | 0   | 0.00  | 0  | 0.00  | 3   | 0.24  | 0    | 0.00  | 3     | 0.02  | PAR    |
| cellular organisms          | 245  | 2.07  | 177 | 74.37 | 4  | 1.65  | 18  | 1.43  | 11   | 0.18  | 455   | 2.30  | O      |
| Clostridiales               | 2    | 0.02  | 2   | 0.84  | 4  | 1.65  | 0   | 0.00  | 2    | 0.03  | 10    | 0.05  | PS     |
| Ditrysia (Lepidoptera)      | 7    | 0.06  | 0   | 0.00  | 0  | 0.00  | 0   | 0.00  | 0    | 0.00  | 7     | 0.04  | HOST   |
| Dothideomycetes             | 2    | 0.02  | 0   | 0.00  | 0  | 0.00  | 0   | 0.00  | 0    | 0.00  | 2     | 0.01  | PS     |
| Eukaryota                   | 5    | 0.04  | 2   | 0.84  | 0  | 0.00  | 3   | 0.24  | 4    | 0.06  | 14    | 0.07  | O      |
| Eulophidae                  | 0    | 0.00  | 0   | 0.00  | 5  | 2.06  | 0   | 0.00  | 0    | 0.00  | 5     | 0.03  | PAR    |
| Euplectrus                  | 3    | 0.03  | 2   | 0.84  | 52 | 21.40 | 0   | 0.00  | 0    | 0.00  | 57    | 0.29  | PAR    |
| Euplectrus bicolor          | 0    | 0.00  | 0   | 0.00  | 8  | 3.29  | 20  | 1.59  | 0    | 0.00  | 28    | 0.14  | PAR    |
| Glyptapanteles              | 0    | 0.00  | 0   | 0.00  | 0  | 0.00  | 22  | 1.75  | 24   | 0.39  | 46    | 0.23  | PAR    |
| Glyptapanteles liparidis    | 0    | 0.00  | 0   | 0.00  | 0  | 0.00  | 17  | 1.35  | 61   | 0.98  | 78    | 0.39  | PAR    |
| Hadeninae                   | 7    | 0.06  | 0   | 0.00  | 0  | 0.00  | 0   | 0.00  | 0    | 0.00  | 7     | 0.04  | O      |
| Helicoverpa armigera        | 8    | 0.07  | 0   | 0.00  | 0  | 0.00  | 0   | 0.00  | 0    | 0.00  | 8     | 0.04  | O      |
| Hymenoptera                 | 6    | 0.05  | 0   | 0.00  | 22 | 9.05  | 35  | 2.78  | 74   | 1.19  | 137   | 0.69  | PAR    |
| Hyposoter                   | 67   | 0.56  | 0   | 0.00  | 0  | 0.00  | 0   | 0.00  | 0    | 0.00  | 67    | 0.34  | PAR    |
| Chrysomelidae sp. SPH01     | 3    | 0.03  | 0   | 0.00  | 0  | 0.00  | 0   | 0.00  | 0    | 0.00  | 3     | 0.02  | O      |
| Ichneumonidae               | 4    | 0.03  | 0   | 0.00  | 0  | 0.00  | 0   | 0.00  | 0    | 0.00  | 4     | 0.02  | PAR    |
| Kineosporiaceae             | 2    | 0.02  | 0   | 0.00  | 0  | 0.00  | 0   | 0.00  | 0    | 0.00  | 2     | 0.01  | PS     |
| Kocuria                     | 0    | 0.00  | 0   | 0.00  | 0  | 0.00  | 0   | 0.00  | 2    | 0.03  | 2     | 0.01  | PS     |
| Lactobacillus               | 4    | 0.03  | 0   | 0.00  | 0  | 0.00  | 3   | 0.24  | 4    | 0.06  | 11    | 0.06  | PS     |
| Lepidoptera                 | 2    | 0.02  | 0   | 0.00  | 0  | 0.00  | 0   | 0.00  | 0    | 0.00  | 2     | 0.01  | HOST   |
| Leucania cruegeri           | 2    | 0.02  | 0   | 0.00  | 0  | 0.00  | 0   | 0.00  | 0    | 0.00  | 2     | 0.01  | O      |
| Lymantria                   | 0    | 0.00  | 0   | 0.00  | 0  | 0.00  | 0   | 0.00  | 4    | 0.06  | 4     | 0.02  | HOST   |
| Lymantria dispar            | 0    | 0.00  | 0   | 0.00  | 0  | 0.00  | 543 | 43.13 | 5972 | 96.01 | 6515  | 32.87 | HOST   |
| Magnoliophyta               | 0    | 0.00  | 0   | 0.00  | 0  | 0.00  | 2   | 0.16  | 0    | 0.00  | 2     | 0.01  | O      |
| Malpighiales                | 5    | 0.04  | 0   | 0.00  | 0  | 0.00  | 0   | 0.00  | 2    | 0.03  | 7     | 0.04  | O      |
| Methylobacterium            | 0    | 0.00  | 2   | 0.84  | 0  | 0.00  | 0   | 0.00  | 0    | 0.00  | 2     | 0.01  | PS     |
| Microbacteriaceae           | 0    | 0.00  | 3   | 1.26  | 0  | 0.00  | 0   | 0.00  | 0    | 0.00  | 3     | 0.02  | PS     |
| Micrococcales               | 0    | 0.00  | 3   | 1.26  | 0  | 0.00  | 0   | 0.00  | 0    | 0.00  | 3     | 0.02  | PS     |
| Microgastrinae              | 0    | 0.00  | 0   | 0.00  | 0  | 0.00  | 6   | 0.48  | 0    | 0.00  | 6     | 0.03  | PAR    |
| Microplitis demolitor       | 0    | 0.00  | 0   | 0.00  | 0  | 0.00  | 0   | 0.00  | 2    | 0.03  | 2     | 0.01  | O      |
| Noctuidae                   | 51   | 0.43  | 0   | 0.00  | 0  | 0.00  | 0   | 0.00  | 0    | 0.00  | 51    | 0.26  | HOST   |
| Obtectomera (Lepidoptera)   | 6    | 0.05  | 0   | 0.00  | 0  | 0.00  | 0   | 0.00  | 3    | 0.05  | 9     | 0.05  | HOST   |
| Odontodes seranensis        | 768  | 6.47  | 0   | 0.00  | 0  | 0.00  | 0   | 0.00  | 0    | 0.00  | 768   | 3.87  | O      |
| Orthosia cruda              | 9793 | 82.56 | 0   | 0.00  | 0  | 0.00  | 0   | 0.00  | 0    | 0.00  | 9793  | 49.40 | HOST   |
| Pedobacter                  | 3    | 0.03  | 0   | 0.00  | 0  | 0.00  | 2   | 0.16  | 3    | 0.05  | 8     | 0.04  | PS     |
| Peribaea fissicornis        | 0    | 0.00  | 4   | 1.68  | 0  | 0.00  | 431 | 34.23 | 0    | 0.00  | 435   | 2.19  | PAR    |
| Proteobacteria              | 4    | 0.03  | 0   | 0.00  | 0  | 0.00  | 8   | 0.64  | 2    | 0.03  | 14    | 0.07  | PS     |
| Pseudomonadaceae            | 620  | 5.23  | 0   | 0.00  | 0  | 0.00  | 0   | 0.00  | 0    | 0.00  | 620   | 3.13  | PS     |
| Pseudomonas                 | 138  | 1.16  | 21  | 8.82  | 14 | 5.76  | 76  | 6.04  | 2    | 0.03  | 251   | 1.27  | PS     |
| Pseudomonas fluorescens     | 0    | 0.00  | 0   | 0.00  | 0  | 0.00  | 3   | 0.24  | 0    | 0.00  | 3     | 0.02  | PS     |
| Pteromalidae                | 10   | 0.08  | 10  | 4.20  | 0  | 0.00  | 0   | 0.00  | 0    | 0.00  | 20    | 0.10  | PAR    |
| Ralstonia                   | 0    | 0.00  | 0   | 0.00  | 0  | 0.00  | 0   | 0.00  | 2    | 0.03  | 2     | 0.01  | PS     |
| Rickettsia                  | 0    | 0.00  | 0   | 0.00  | 42 | 17.28 | 0   | 0.00  | 0    | 0.00  | 42    | 0.21  | PS     |
| Solanum lycopersicum        | 8    | 0.07  | 0   | 0.00  | 0  | 0.00  | 0   | 0.00  | 0    | 0.00  | 8     | 0.04  | O      |
| Sphingomonadaceae           | 7    | 0.06  | 0   | 0.00  | 0  | 0.00  | 10  | 0.79  | 3    | 0.05  | 20    | 0.10  | PS     |
| Spodoptera frugiperda       | 3    | 0.03  | 0   | 0.00  | 0  | 0.00  | 0   | 0.00  | 0    | 0.00  | 3     | 0.02  | O      |
| Staphylococcaceae           | 0    | 0.00  | 0   | 0.00  | 0  | 0.00  | 2   | 0.16  | 0    | 0.00  | 2     | 0.01  | PS     |
| Stenotrophomonas rhizophila | 0    | 0.00  | 0   | 0.00  | 0  | 0.00  | 26  | 2.07  | 0    | 0.00  | 26    | 0.13  | PS     |
| Tetrastichinae              | 0    | 0.00  | 0   | 0.00  | 4  | 1.65  | 0   | 0.00  | 0    | 0.00  | 4     | 0.02  | PAR    |

|                     |       |        |     |        |     |        |      |        |      |        |       |        |    |
|---------------------|-------|--------|-----|--------|-----|--------|------|--------|------|--------|-------|--------|----|
| Xanthomonadaceae    | 0     | 0.00   | 8   | 3.36   | 0   | 0.00   | 0    | 0.00   | 0    | 0.00   | 8     | 0.04   | PS |
| <i>Not assigned</i> | 44    | 0.37   | 2   | 0.84   | 17  | 7.00   | 6    | 0.48   | 18   | 0.29   | 87    | 0.44   | O  |
| $\Sigma$            | 11862 | 100.00 | 238 | 100.00 | 243 | 100.00 | 1259 | 100.00 | 6220 | 100.00 | 19822 | 100.00 |    |

Presented are MOTUs after all quality processing steps and clustering procedure with subsequent discarding of singletons. The information about number and % of reads within individual clusters and their probable origin is shown.

PAR = putative parasitoids, HOST = putative hosts, PS = putative symbionts, O = others (other taxa and not assigned sequences).
